# Supplementary material
Source: ML conference proceedings conference paper supplement (https://openreview.net/forum?id=KvL8DVrR34)
Supplement: supplementary_material [file attachment]

Case #FLARETs\_0043(slice 84, 120, 135)

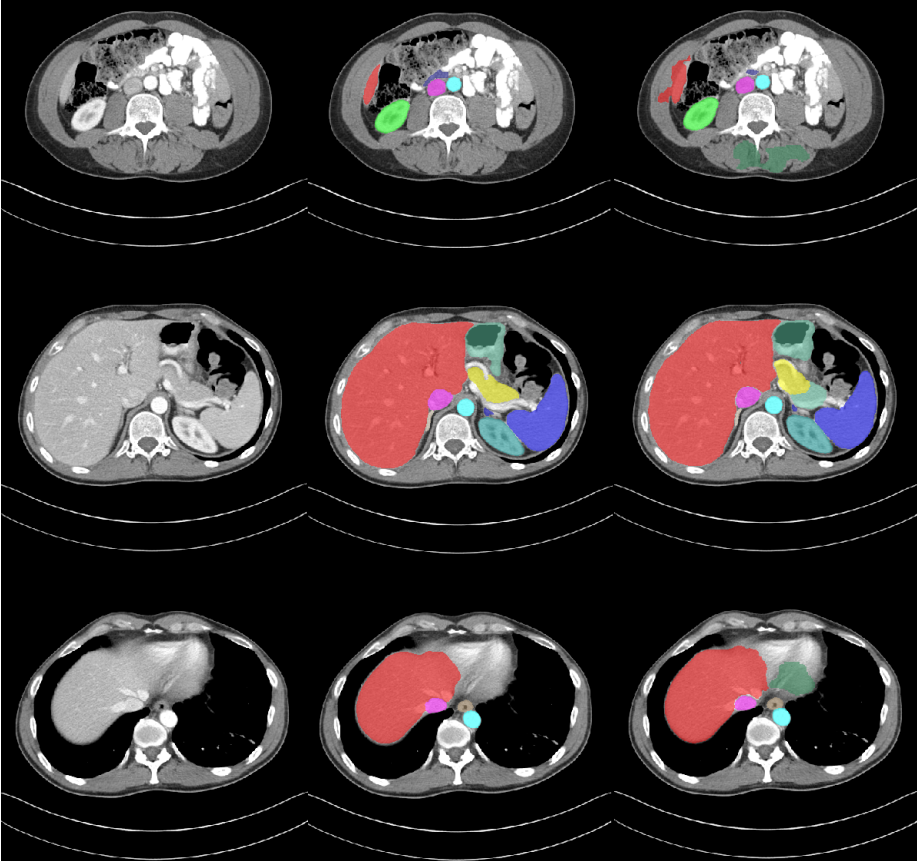

Image

Ground Truth

Prediction

Case #FLARETs\_0059(slice 84, 98, 110)

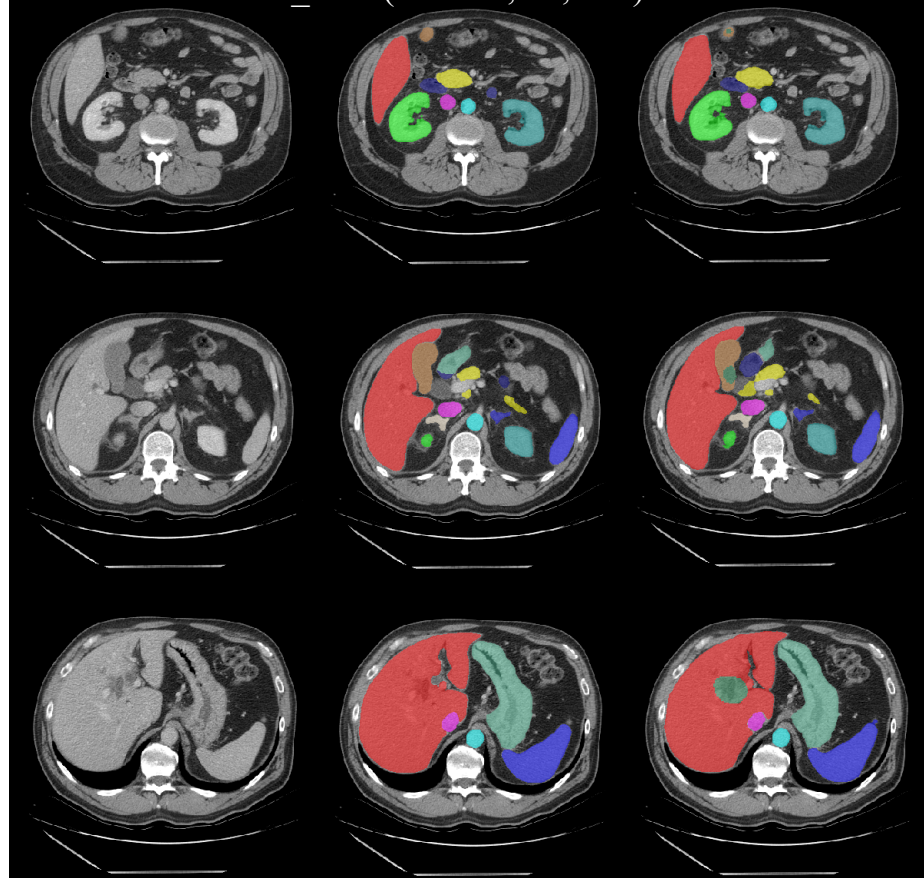

Image

Ground Truth

Prediction
