# Supplementary material
Source: ML conference proceedings conference paper supplement (https://openreview.net/forum?id=KvL8DVrR34)
Supplement: supplementary_material [file attachment]

Case #FLARETs\_0029(slice 294, 328, 358)

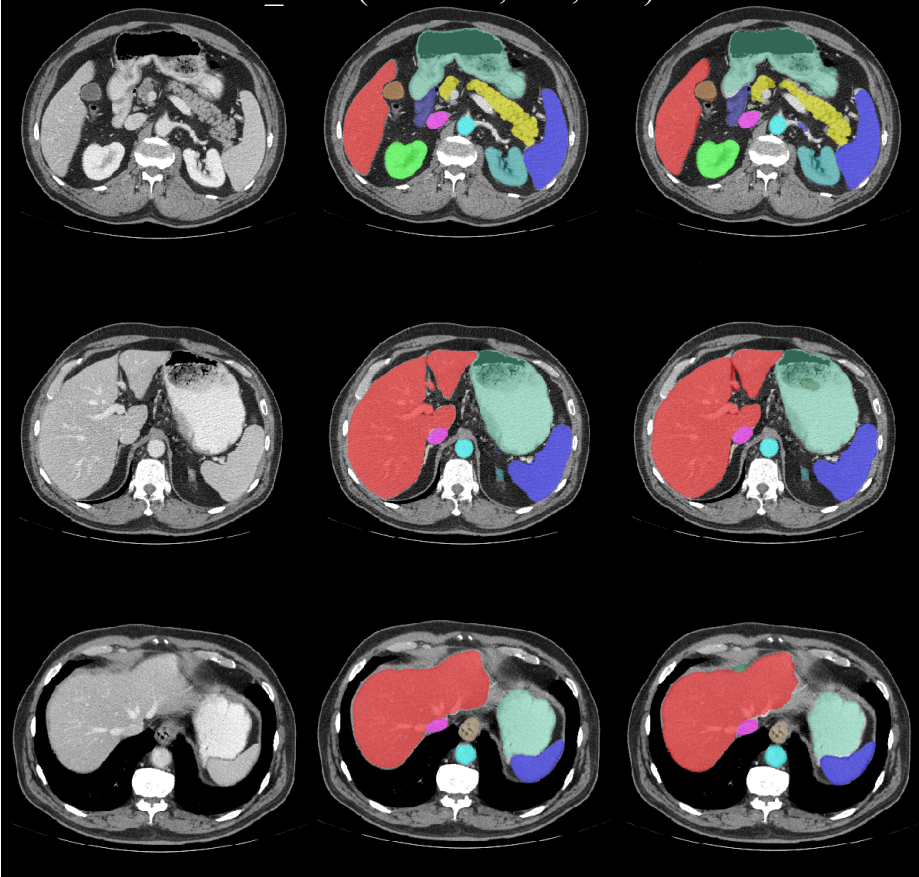

Image

Ground Truth

Prediction

Case #FLARETs\_0073(slice 119, 146, 177)

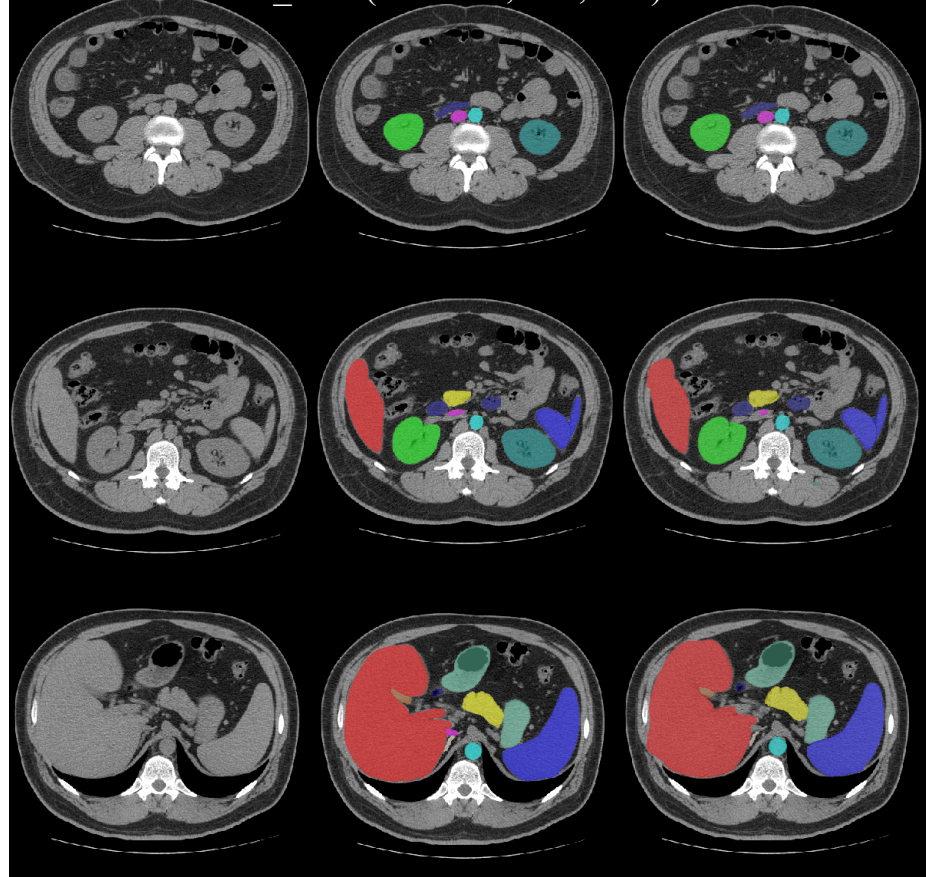

Image

Ground Truth

Prediction
