# Supplementary material
Source: ML conference proceedings conference paper supplement (https://openreview.net/forum?id=KvL8DVrR34)

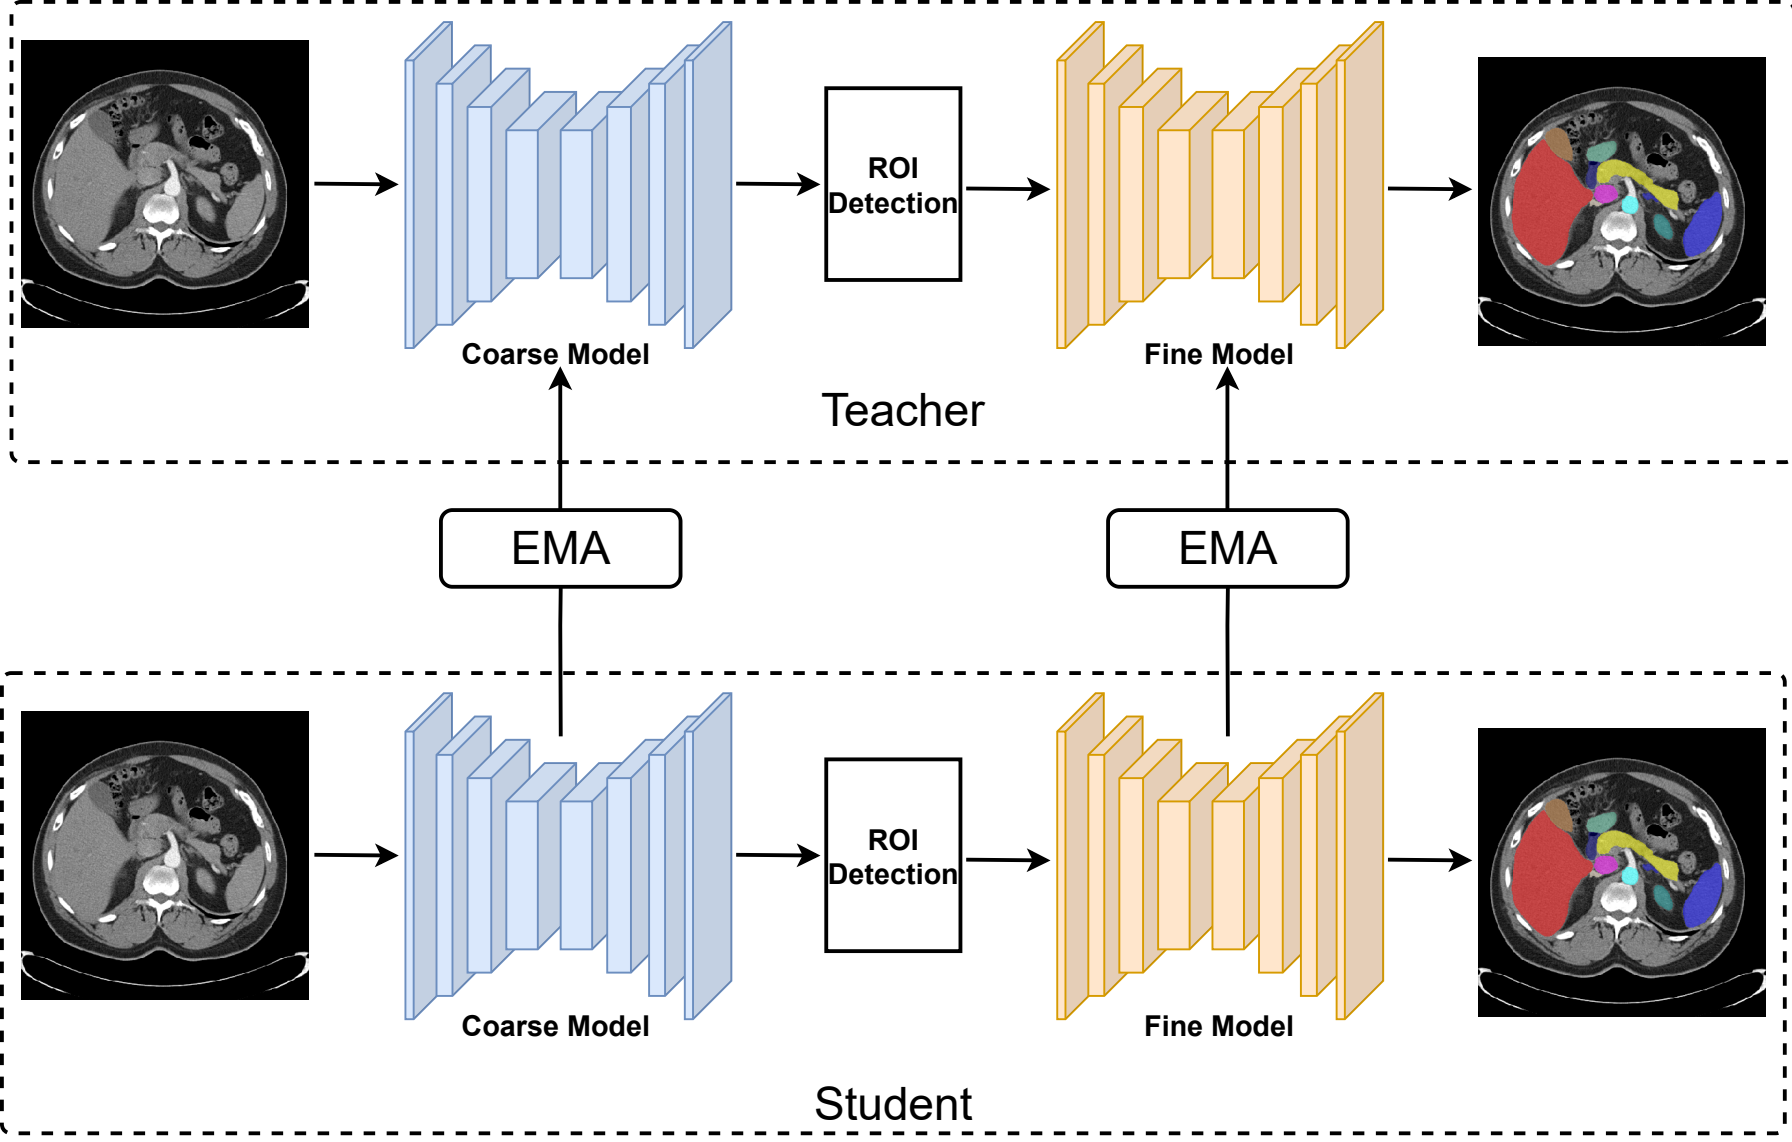

Supplement: supplementary_material [file attachment]

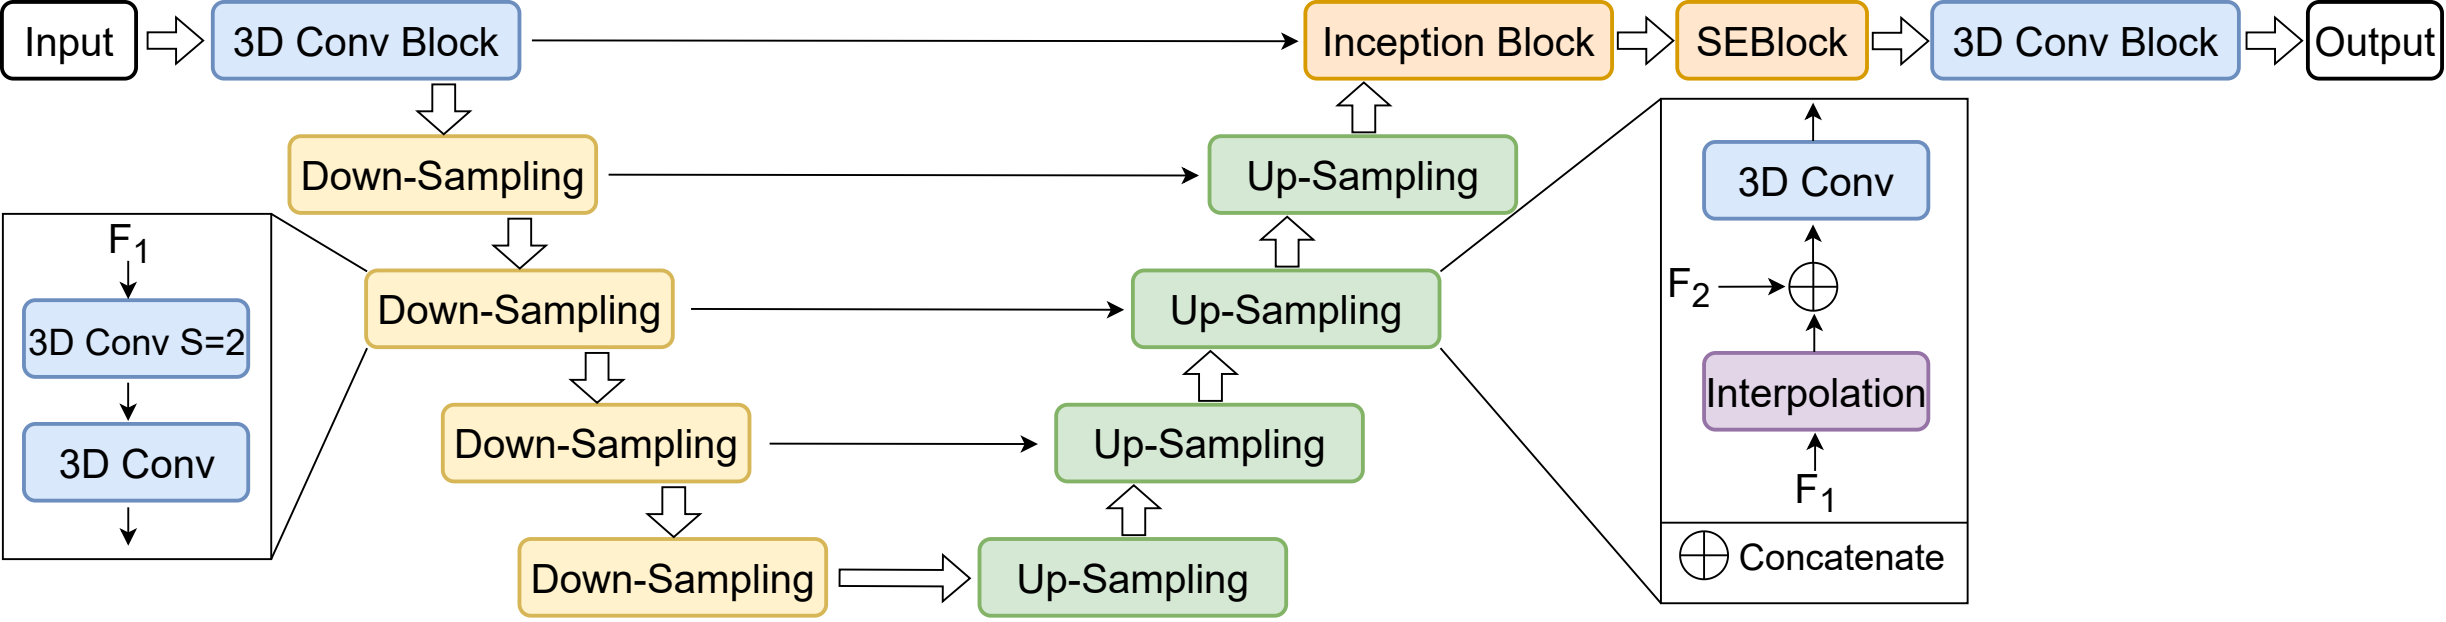

Supplement: supplementary_material [file attachment]

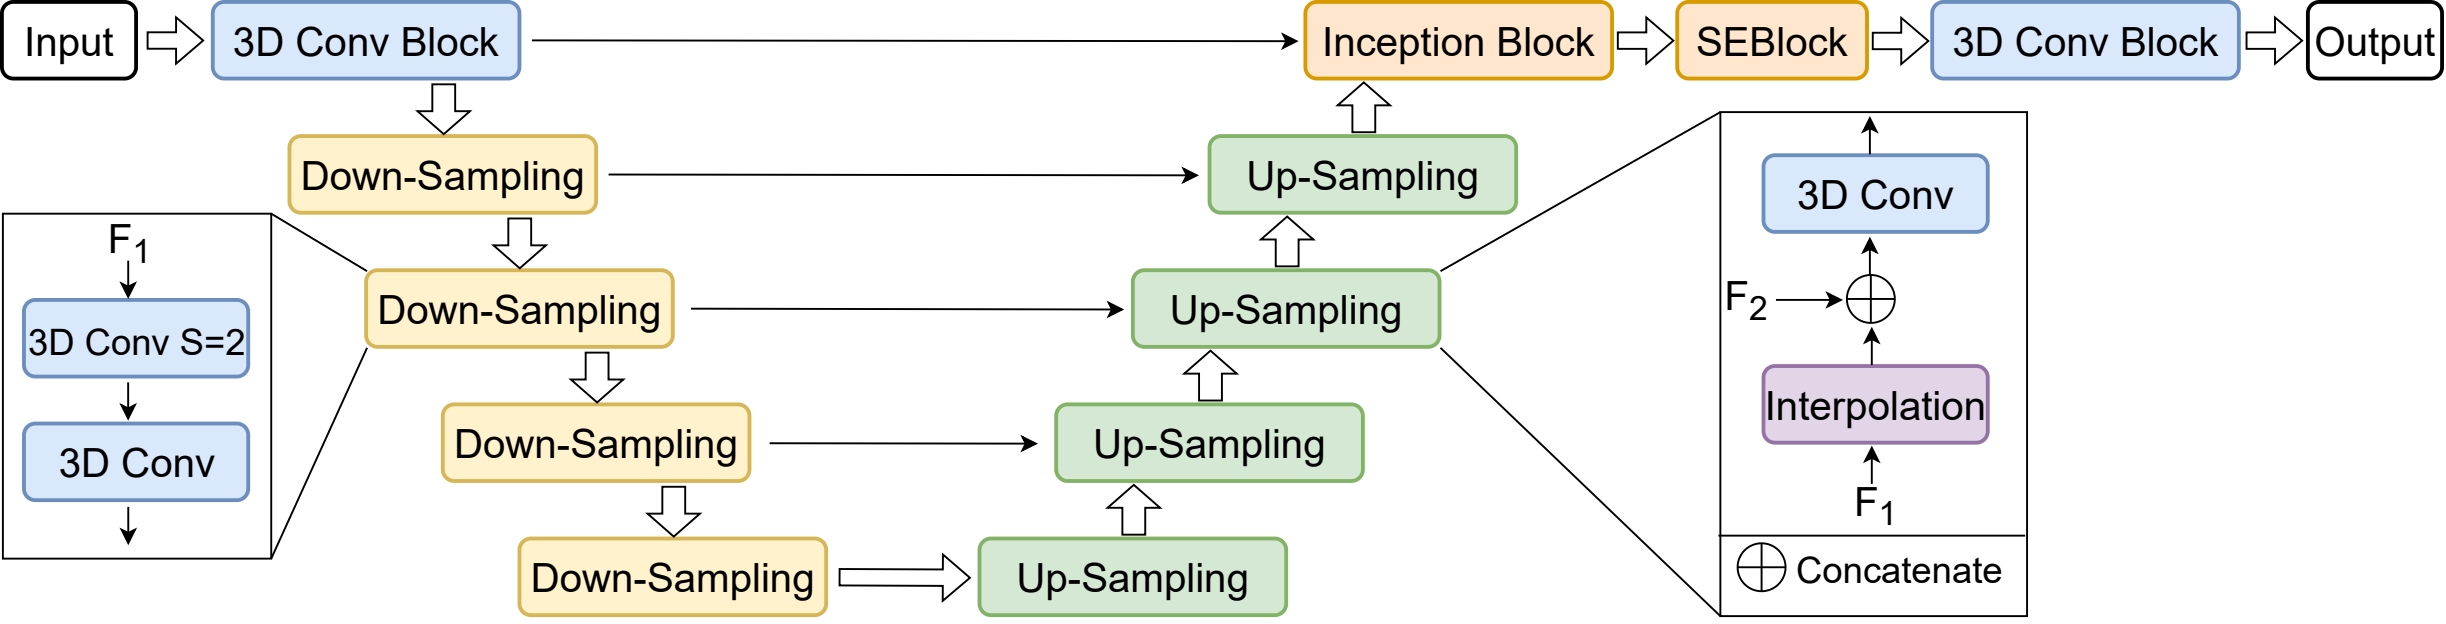

Supplement: supplementary_material [file attachment]

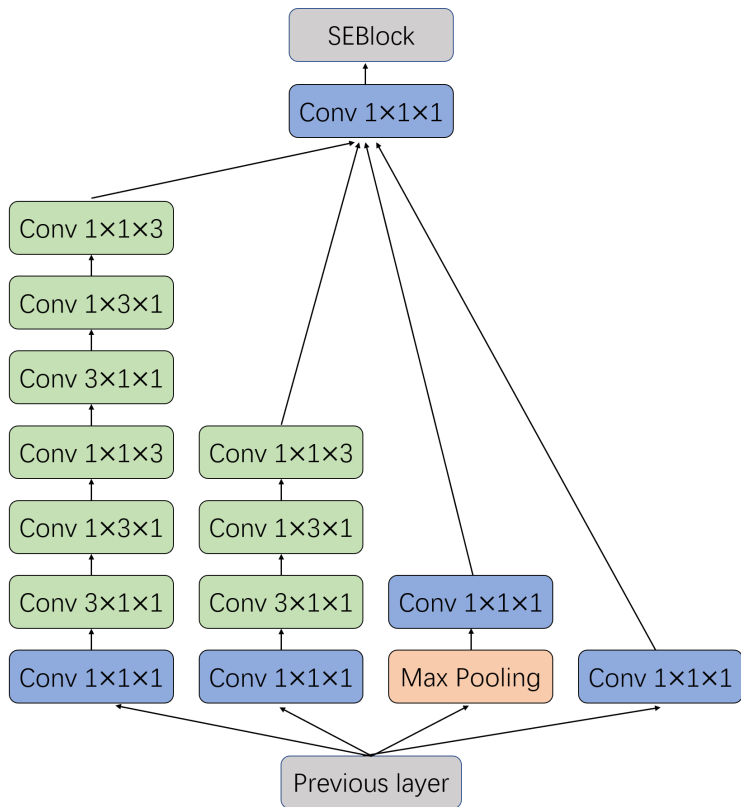

(a) Inception Block

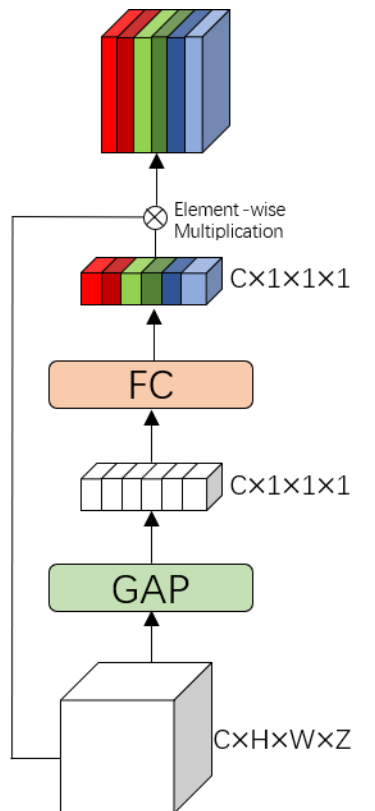

(b) SEBlock

Supplement: supplementary_material [file attachment]
